# Supplementary material
Source: Research Square preprint supplement (doi:10.21203/rs.3.rs-8952241/v1)
Supplement: Supplementary file 1 [file 12e9bd8dd2bef4c830696f7f.docx]

**Supplementary File 1: Research Questionnaire**

**Title:** Knowledge and Implementation of Early Warning System (EWS) among Healthcare Professionals

**Instruction:** Please read each statement carefully and mark ✓ in the column that best reflects your knowledge.

| **No.** | **Statement** | **True** | **False** |
| --- | --- | --- | --- |
|  | **Definitions** | | |
| 1. | *The Early Warning System (EWS) is a system for early detection of potential clinical deterioration in patients.* |  |  |
| 2. | *EWS is utilized to assist healthcare providers in monitoring patient conditions periodically.* |  |  |
| 3. | EWS assessment is performed by scoring six physiological parameters: respiratory rate, oxygen saturation, temperature, pulse rate, systolic blood pressure, and level of consciousness. |  |  |
| 4. | Proper use of EWS can help reduce the risk of delays in patient management. |  |  |
|  | **Goals and Benefits of EWS** | | |
| 5. | *EWS is only intended for patients who are already in critical condition.* |  |  |
| 6. | The primary goal of implementing EWS is to enhance patient safety. |  |  |
| 7. | Patients planned for discharge still require EWS scoring. |  |  |
| 8. | *EWS helps detect patient emergencies before the condition becomes more severe.* |  |  |
| 9. | Proper use of EWS helps minimize the risk of delayed clinical response. |  |  |
|  | **Physiological Parameters in EWS** | | |
| 10. | Extreme increases or decreases in body temperature can affect the EWS score. |  |  |
| 11. | Urine output is not included in standard EWS scoring but is included in modified EWS criteria. |  |  |
| 12. | Patients who do not respond verbally, motorically, or visually are categorized as 'unresponsive'. |  |  |
| 13. | Monitoring urine output does not indicate a risk of fluid volume deficit. |  |  |
| 14. | Age has no influence on EWS scoring. |  |  |
| 15. | EWS scoring is influenced by factors such as ethnicity, lifestyle, and obesity. |  |  |
| 16. | Pain assessment is an additional parameter in EWS scoring. |  |  |
|  | **Assessment Categories and Interpretation** | | |
| 17. | EWS assessment results help healthcare providers determine appropriate clinical actions. |  |  |
| 18. | EWS scores are categorized into two levels: low risk and high risk. |  |  |
| 19. | The low-risk category corresponds to an EWS total score of 1–5. |  |  |
| 20. | The higher the EWS score, the higher the risk of patient deterioration. |  |  |
| 21. | A high EWS score indicates that the patient requires more intensive monitoring. |  |  |
| 22. | The method for EWS scoring in adult surgical patients differs from that used for obstetric and gynecological patients. |  |  |
|  | **Role of Healthcare Providers in EWS** | | |
| 23. | EWS assessment results assist healthcare providers in clinical decision-making. |  |  |
| 24. | EWS assessments do not need to be documented in the patient's medical records. |  |  |
| 25. | EWS scoring does not need further evaluation once the patient's vital signs have improved. |  |  |
| 26. | EWS facilitates communication between healthcare providers regarding a patient's condition. |  |  |
| 27. | Healthcare providers play a vital role in EWS scoring to minimize deterioration and sudden death. |  |  |
|  | **Standardization of EWS** | | |
| 28. | Observation systems using EWS have strong legal standing and are professionally accountable. |  |  |
| 29. | Training on EWS usage is not required for newly recruited healthcare staff. |  |  |
| 30. | Each hospital may have different EWS guidelines without following patient safety service standards. |  |  |
